# Supplementary material for: Screening of Antioxidative Properties and Inhibition of Inflammation-Linked Enzymes by Aqueous and Ethanolic Extracts of Plants Traditionally Used in Wound Healing in Poland
Source: MDPI journal article supplement (doi:10.3390/antiox10050698), 2021-04-28
Supplement: s1 [file s1]

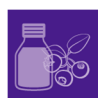

# Supplementary Materials: Screening of Antioxidative Properties and Inhibition of Inflammation-Linked Enzymes by Aqueous and Ethanolic Extracts of Plants Traditionally Used in Wound Healing in Poland

Marta Mainka <sup>1</sup>, Monika E. Czerwińska <sup>1</sup>, Ewa Osinska <sup>2</sup>, Maria Ziaja <sup>3</sup> and Agnieszka Bazyłko <sup>1,\*</sup>

<sup>1</sup> Department of Pharmacognosy and Molecular Basis of Phytotherapy, Warsaw Medical University, Banacha 1, 02-097 Warsaw, Poland; marta.rogowska@wum.edu.pl (M.M.); monika.czerwinska@wum.edu.pl (M.E.C.)

<sup>2</sup> Department of Vegetable and Medicinal Plants, Warsaw University of Life Sciences, Nowoursynowska 159, 02-776 Warsaw, Poland; ewa\_osinska@sggw.pl

<sup>3</sup> Institute of Physical Culture Studies, Rzeszów University, Cicha 2a, 35-326 Rzeszów, Poland; mziaja@ur.edu.pl

\* Correspondence: agnieszka.bazylko@wum.edu.pl

**Table S1.** Timetable for preparing the extracts and conducting the experiments.

| Activity.                                                                                       | Start Date | End Date   |
|-------------------------------------------------------------------------------------------------|------------|------------|
| UHPLC-DAD-MS <sup>n</sup> Analysis                                                              | 08-23-2017 | 09-12-2017 |
| Preparation of extracts                                                                         | 10-14-2016 | 12-14-2016 |
| Determination of extracts ability for the scavenging of DPPH                                    | 12-20-2016 | 01-26-2017 |
| Determination of extracts ability for the scavenging of superoxide anion                        | 01-31-2017 | 03-09-2017 |
| Determination of extracts ability for the scavenging of hydrogen peroxide                       | 09-14-2017 | 10-03-2017 |
| Determination of extracts effect on the Lipoxigenase activity                                   | 04-27-2017 | 08-24-2017 |
| Determination of extracts effect on the Hyaluronidase activity                                  | 10-26-2017 | 12-21-2017 |
| Determination of total polyphenol content by colorimetric method with Folin'a Ciocalteu reagent | 09-05-2017 | 09-05-2017 |

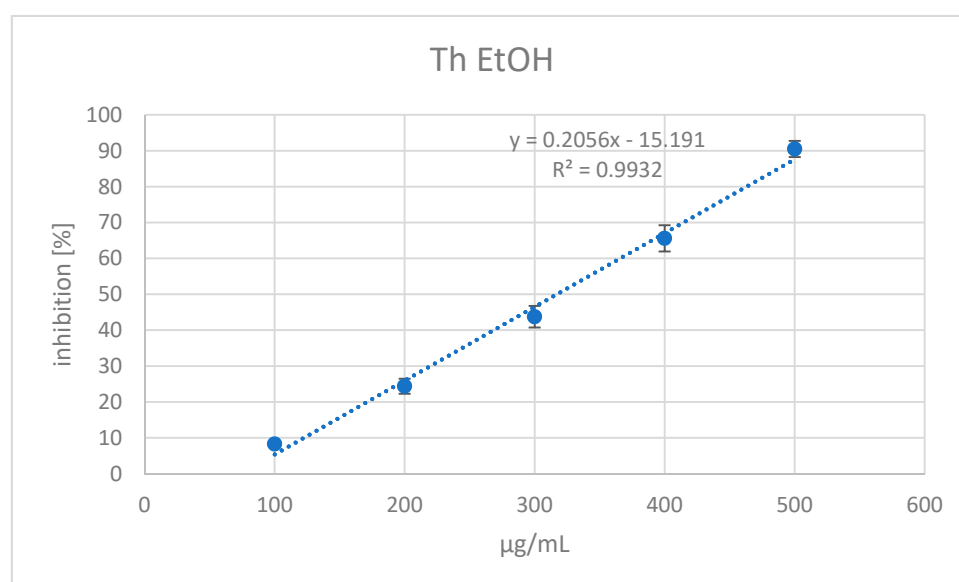

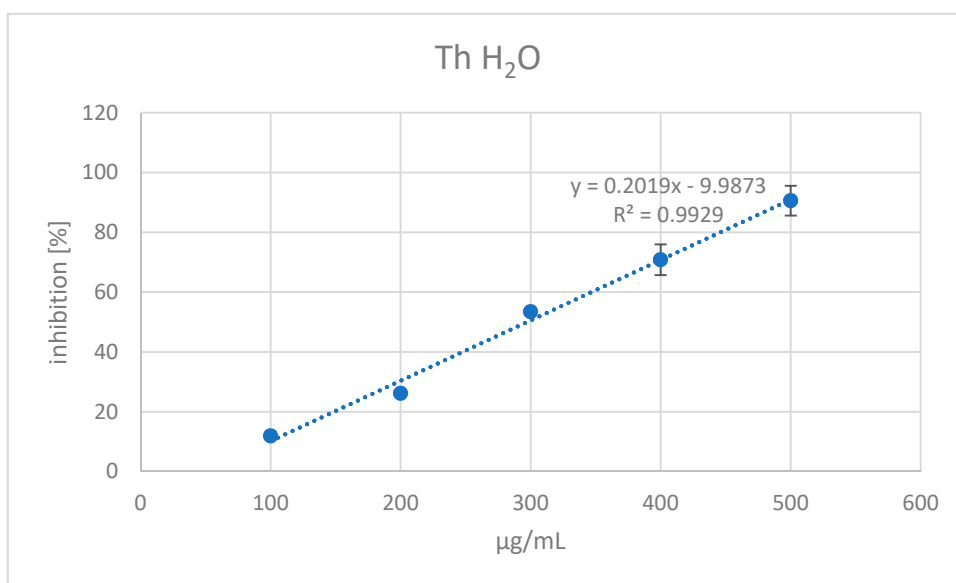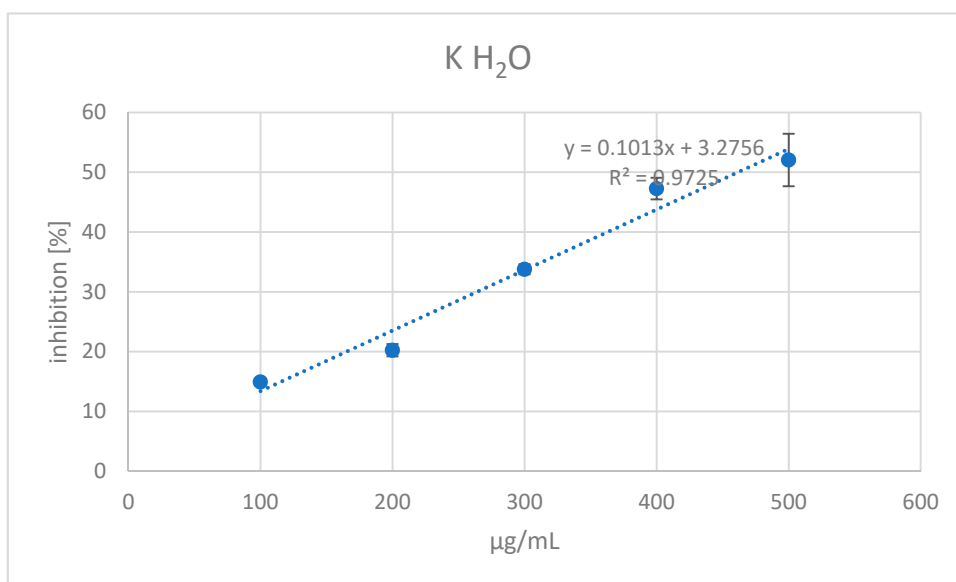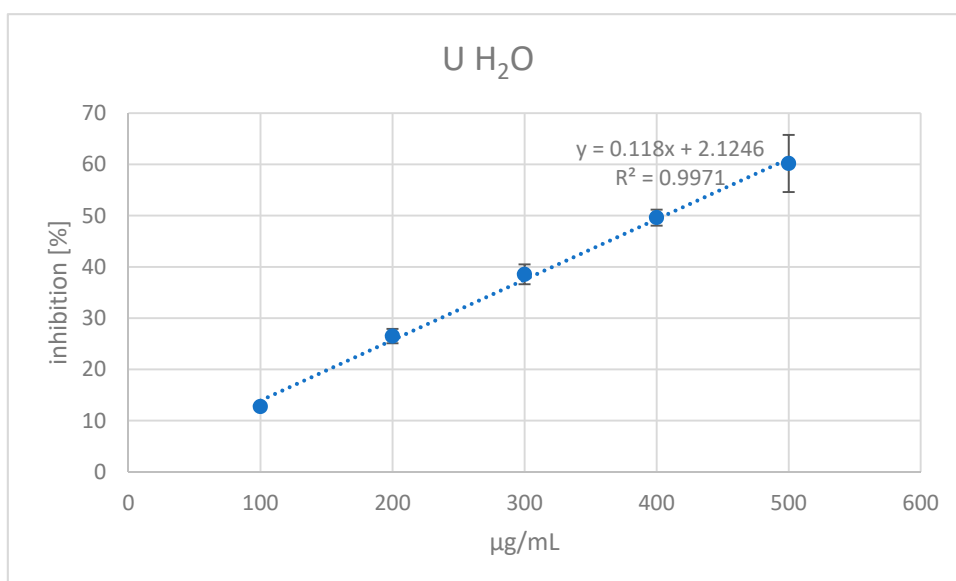

**Figure S1.** Concentration-activity curves of the most active extracts in the test of LOX inhibitory activity. Th EtOH – *Serpylli herba* ethanolic extract, Th H<sub>2</sub>O – *Serpylli herba* aqueous extract, K H<sub>2</sub>O – *Milefolli herba* aqueous extract, U H<sub>2</sub>O – *Urticae herba* aqueous extract.
